# Supplementary material
Source: Springer Nature journal article supplement (https://www.springermedizin.de/resource/supplementary/13098_2014_386_MOESM3_ESM.docx/9670960)
Supplement: MOESM3 [file 9670960]

Figure 4.
